# Supplementary material for: Biological Performance of Titanium Surfaces with Different Hydrophilic and Nanotopographical Features
Source: MDPI journal article supplement (doi:10.3390/ma16237307), 2023-11-24
Supplement: s1 [file s1]

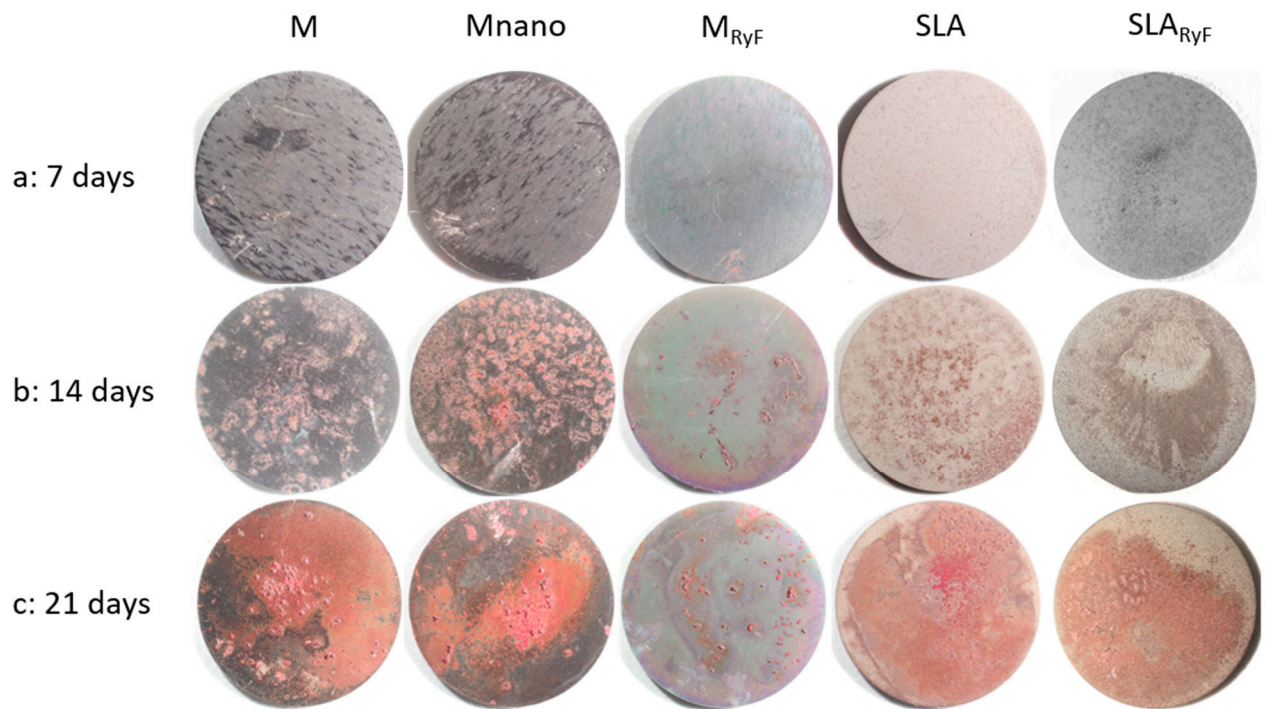

**Figure S1.** Osteogenic differentiation of osteoblasts on different hydrophobic titanium surfaces. Representative images of the different hydrophobic titanium disks with seeded SAOS-2 at different time points since onset of differentiation. With prolonged differentiation after (a) 7 days, (b) 14 days and (c) 21 days a visible increase in calcium phosphate formation stained with alizarin red is seen (disks diameter: 1,5 cm).
